# Supplementary material
Source: Springer Nature journal article supplement (https://www.springermedizin.de/resource/supplementary/13022_2009_24_MOESM3_ESM.pdf/9641298)

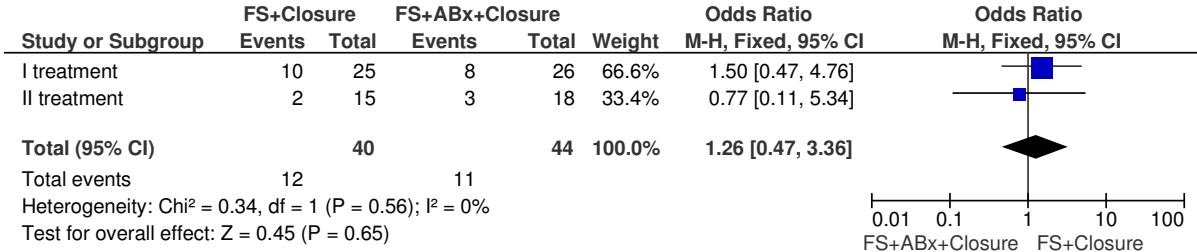

Supplement: MOESM3 [file 9641298]
